# Supplementary material
Source: PubMed Central journal article supplement (PMC4241152)
Supplement: NIHMS626758-supplement-Supporting_Material.pdf [file NIHMS626758-supplement-Supporting_Material.pdf]

## Legends for Supporting Figures

### Figure S1. Effect of Adenoviral Vector Expressing *Gnb1* shRNA or Scrambled (Scr) shRNA on

Gβ1 Levels in Neuro 2A cells. Neuro 2A cells were transduced with adenovirus expressing

*Gnb1* shRNA or scrambled shRNA (MOI 50), plated and incubated for the times indicated.

Cells were harvested and lysates subjected to immunoblotting using an antibody for Gβ1

(Protein Tech, 1:1000) followed by secondary antibody and visualization with ECL reagent (top

panel). Protein bands were quantified using BioRad Quantity One software, and values for Gβ1

were normalized for protein loading by calculating a ratio of Gβ1 to β-tubulin (bottom panel). U,

untransduced; S, Scr, transduced with adenoviral vector expressing scrambled shRNA and

harvested after 24 or 96 hr; G, *gnb1*, transduced with adenoviral vector expressing *Gnb1*

shRNA and harvested after 24 hr, 48 hr, 72 hr or 96 hr, as indicated.

### Figure S2. Effect of Adenoviral Vector Expressing *Gnb1* shRNA on Gβ1 levels in Brains of

DBA/2 Mice. Mice were injected bilaterally into the nucleus accumbens with adenoviral vector

expressing *Gnb1* shRNA (n=3) or scrambled (Scr) shRNA (n=2) and Gβ1 and GFP were

visualized by immunohistochemistry, as described in the text. A. Brain sections from nucleus

accumbens (Bregma +0.98) of a mouse injected with adenovirus expressing *Gnb1* shRNA

(Gnb) and a mouse injected with adenovirus expressing scrambled shRNA (Scr) at 26 days

after injection. In both sections, representative GFP-expressing cells (green arrows; cells

infected by the adenovirus), Gβ1-expressing cells (red arrows) and cells coexpressing GFP and

Gβ1 (white arrows) are visible. B. Gβ1- and GFP-expressing cells in the nucleus accumbens

were counted across sections from Bregma +0.98 to Bregma +1.54 (2-4 sections per mouse),

as described in the text. Data represent mean ± SEM of cells from 5 (Scr shRNA) or 10 (*Gnb1*

shRNA) sections. \*Student's t- test,  $t(13)=4.25$ ,  $P < 0.001$

Figure S3. Effectiveness of sampling scheme and batch effects adjustment. The 15,259 probe sets that survived filtering for masking for probe integrity and filtering for detection above background in the data set were included in the hierarchical clustering in A and B. Samples are labeled by line (HAP for high alcohol preference, LAP for low alcohol preference, or HS for heterogeneous stock), generation, sample number within that line/generation, and batch, with fields separated by periods. One minus the Pearson correlation coefficient was used as a distance measure. A) Expression values prior to batch effects adjustment clustered primarily on batch (first horizontal bar at bottom of graphic; ranging from dark purple for batch 1 to white for batch 6) with some effects of line (second horizontal bar; heterogeneous stock in green, HAP in red, and LAP in blue) and generation (third horizontal bar; ranging from white for generation 0, i.e., heterogeneous stock, to dark green for generation 13). B) Expression values after batch effects adjustment clustered primarily by line (second horizontal bar) with some secondary clustering by generation (third horizontal bar).

Figure S1

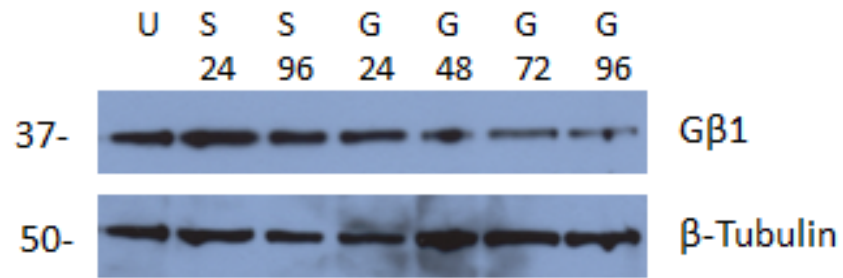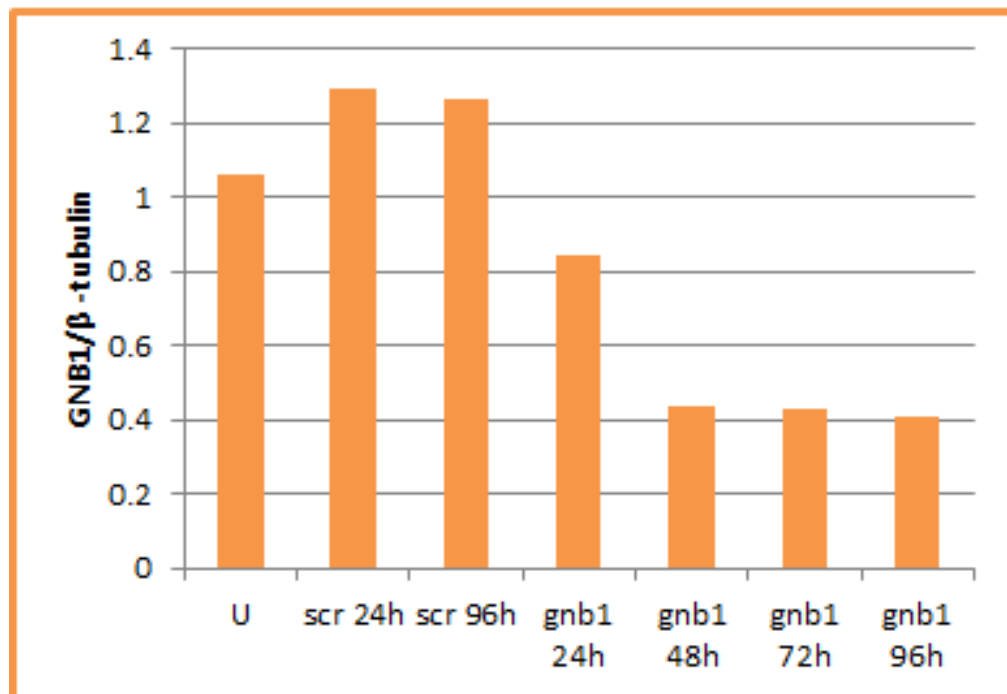

Figure S2A

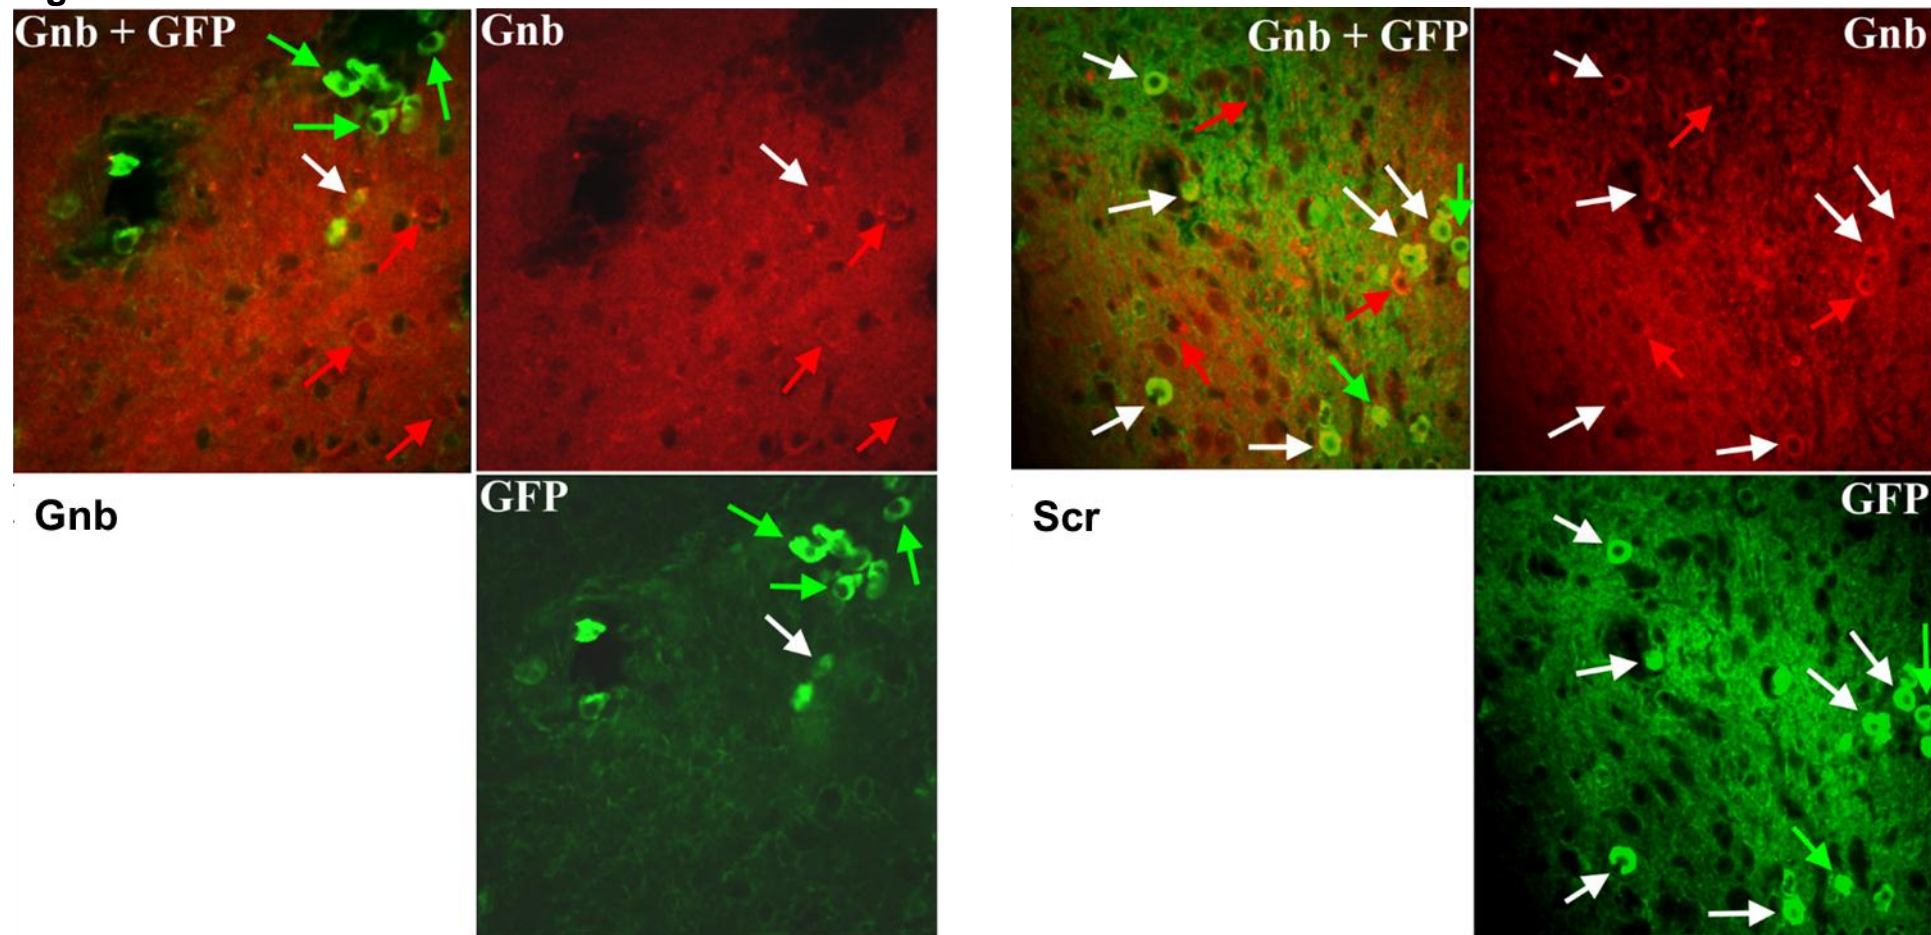

Figure S2B

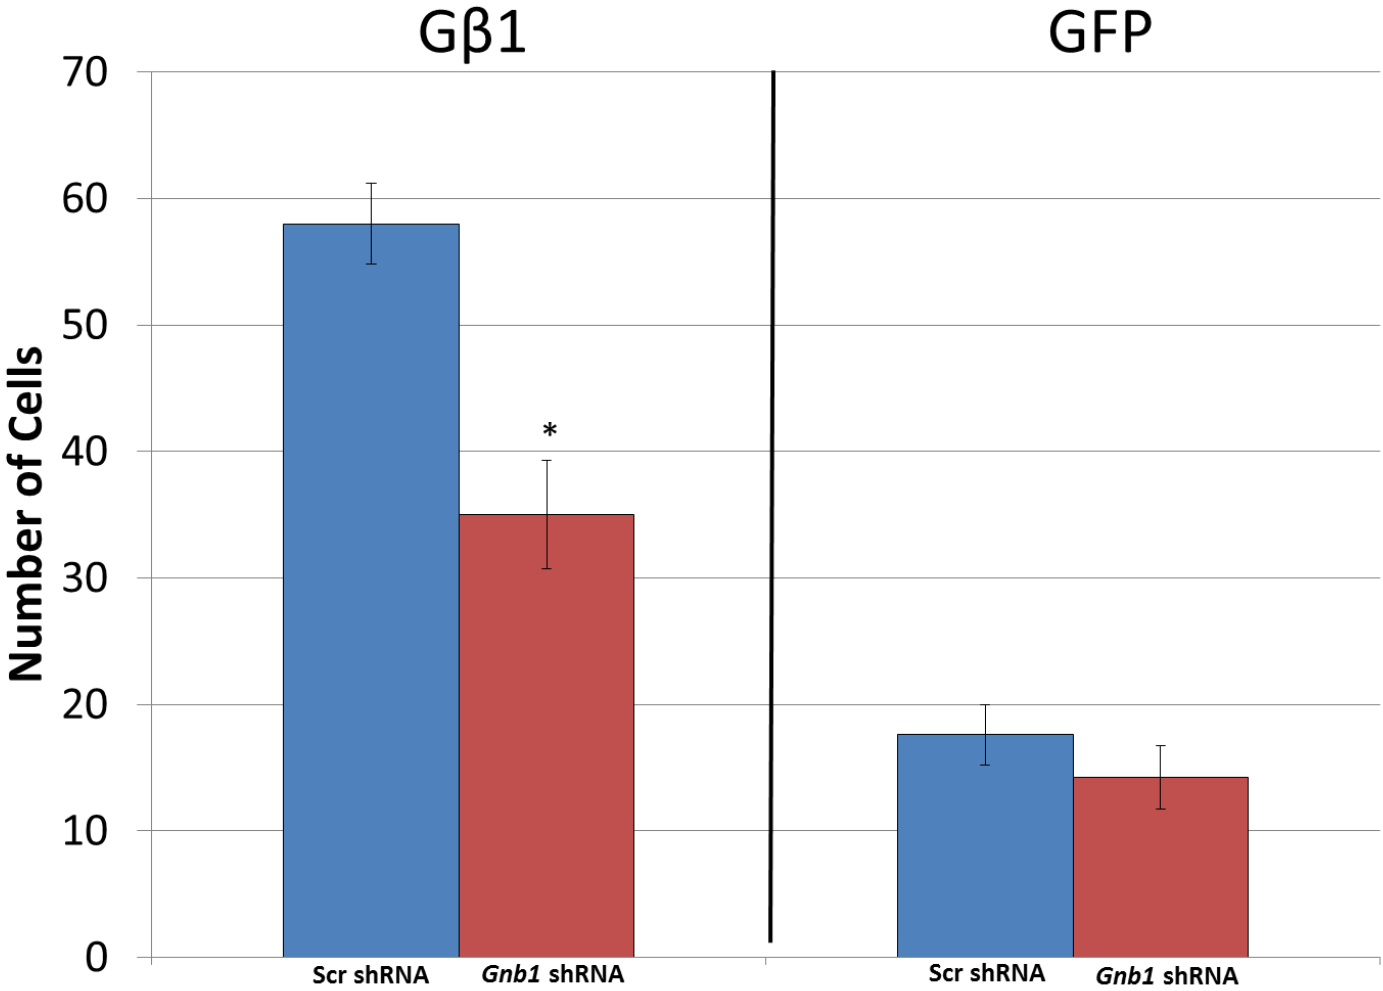

Figure S3

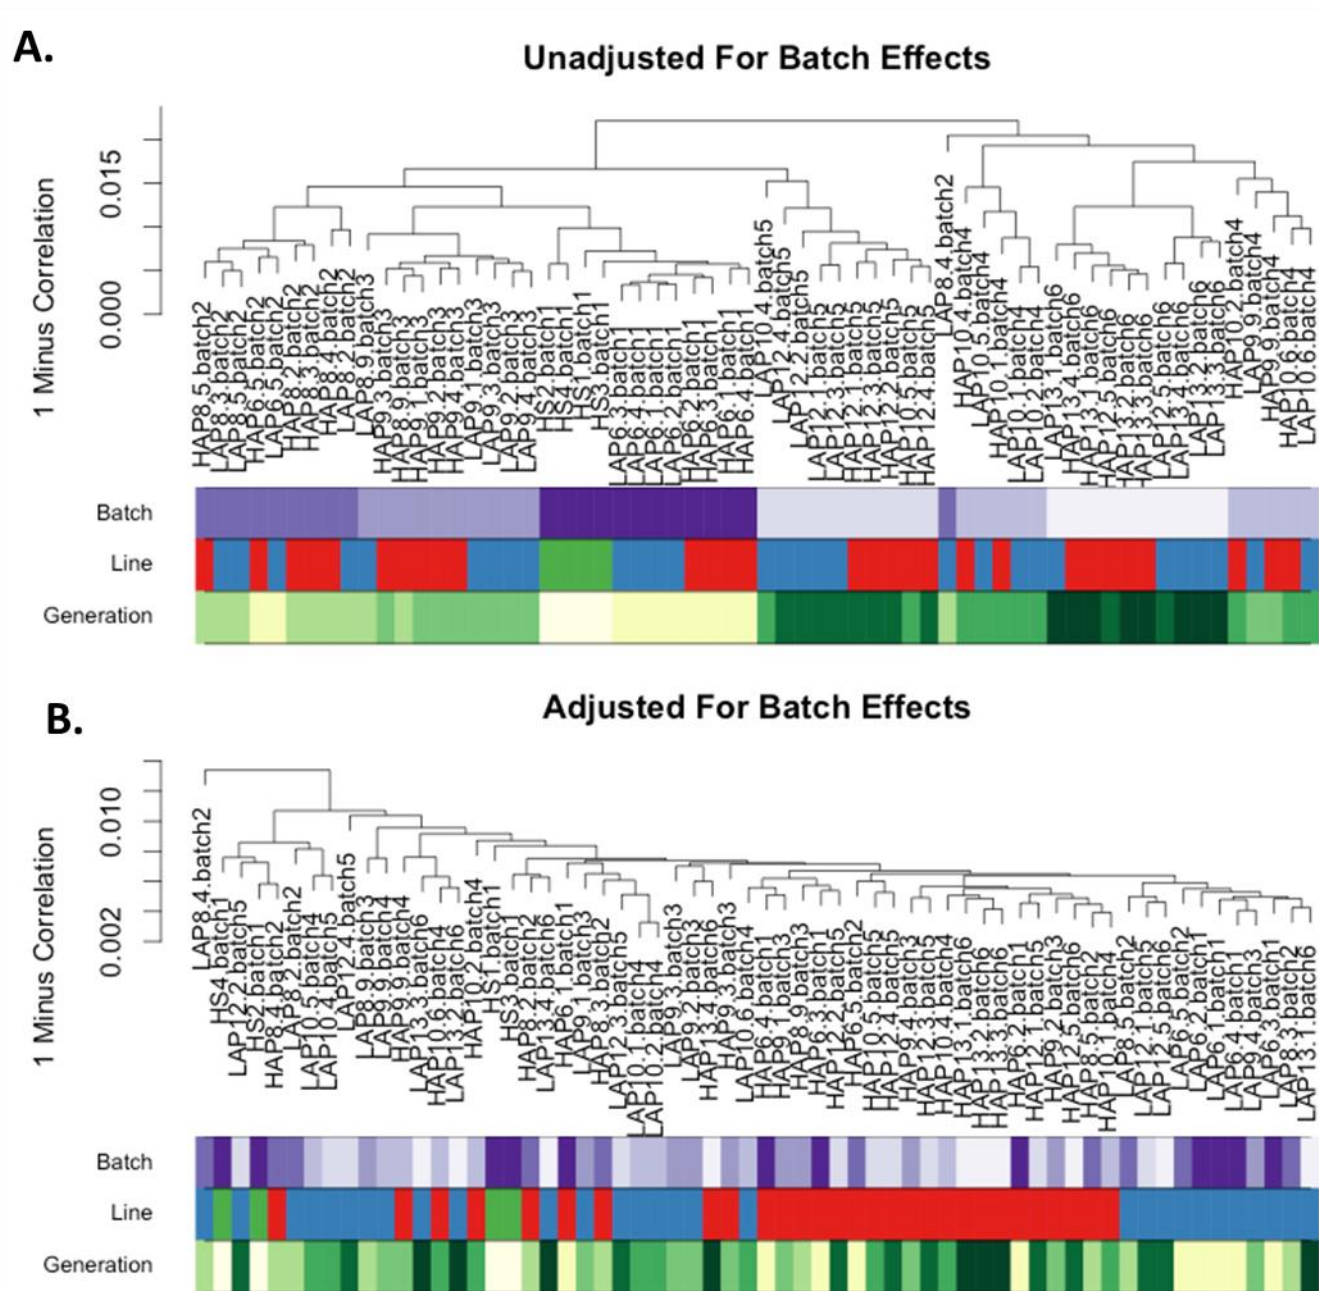

| <b>Table S1. Statistical Analysis of Differential Expression Scenarios.</b> |                                                                                                                                                                                                |                                                                                                                                                                 |                                                                                                                                  |                                                                                                   |                                                                 |                                           |
|-----------------------------------------------------------------------------|------------------------------------------------------------------------------------------------------------------------------------------------------------------------------------------------|-----------------------------------------------------------------------------------------------------------------------------------------------------------------|----------------------------------------------------------------------------------------------------------------------------------|---------------------------------------------------------------------------------------------------|-----------------------------------------------------------------|-------------------------------------------|
|                                                                             | Scenario 1                                                                                                                                                                                     | Scenario 2                                                                                                                                                      | Scenario 3                                                                                                                       | Scenario 4                                                                                        | Scenario 5                                                      | Scenario 6                                |
|                                                                             | Differentially Expressed At Generation 6 and every subsequent generation                                                                                                                       | Differentially Expressed At Generation 8 and every subsequent generation                                                                                        | Differentially Expressed At Generation 9 and every subsequent generation                                                         | Differentially Expressed At Generation 10 and every subsequent generation                         | Differentially Expressed At Generation 12 and Generation 13     | Differentially Expressed At Generation 13 |
| Transcript 1                                                                | $p_6 < \text{threshold}_1$ and $p_8 < \text{threshold}_1$ and $p_9 < \text{threshold}_1$ and $p_{10} < \text{threshold}_1$ and $p_{12} < \text{threshold}_1$ and $p_{13} < \text{threshold}_1$ | $p_8 < \text{threshold}_2$ and $p_9 < \text{threshold}_2$ and $p_{10} < \text{threshold}_2$ and $p_{12} < \text{threshold}_2$ and $p_{13} < \text{threshold}_2$ | $p_9 < \text{threshold}_3$ and $p_{10} < \text{threshold}_3$ and $p_{12} < \text{threshold}_3$ and $p_{13} < \text{threshold}_3$ | $p_{10} < \text{threshold}_4$ and $p_{12} < \text{threshold}_4$ and $p_{13} < \text{threshold}_4$ | $p_{12} < \text{threshold}_5$ and $p_{13} < \text{threshold}_5$ | $p_{13} < \text{threshold}_6$             |
| Transcript 2                                                                | $p_6 < \text{threshold}_1$ and $p_8 < \text{threshold}_1$ and $p_9 < \text{threshold}_1$ and $p_{10} < \text{threshold}_1$ and $p_{12} < \text{threshold}_1$ and $p_{13} < \text{threshold}_1$ | $p_8 < \text{threshold}_2$ and $p_9 < \text{threshold}_2$ and $p_{10} < \text{threshold}_2$ and $p_{12} < \text{threshold}_2$ and $p_{13} < \text{threshold}_2$ | $p_9 < \text{threshold}_3$ and $p_{10} < \text{threshold}_3$ and $p_{12} < \text{threshold}_3$ and $p_{13} < \text{threshold}_3$ | $p_{10} < \text{threshold}_4$ and $p_{12} < \text{threshold}_4$ and $p_{13} < \text{threshold}_4$ | $p_{12} < \text{threshold}_5$ and $p_{13} < \text{threshold}_5$ | $p_{13} < \text{threshold}_6$             |
|                                                                             |                                                                                                                                                                                                |                                                                                                                                                                 |                                                                                                                                  |                                                                                                   |                                                                 |                                           |
| Transcript 15,259                                                           | $p_6 < \text{threshold}_1$ and $p_8 < \text{threshold}_1$ and $p_9 < \text{threshold}_1$ and $p_{10} < \text{threshold}_1$ and $p_{12} < \text{threshold}_1$ and $p_{13} < \text{threshold}_1$ | $p_8 < \text{threshold}_2$ and $p_9 < \text{threshold}_2$ and $p_{10} < \text{threshold}_2$ and $p_{12} < \text{threshold}_2$ and $p_{13} < \text{threshold}_2$ | $p_9 < \text{threshold}_3$ and $p_{10} < \text{threshold}_3$ and $p_{12} < \text{threshold}_3$ and $p_{13} < \text{threshold}_3$ | $p_{10} < \text{threshold}_4$ and $p_{12} < \text{threshold}_4$ and $p_{13} < \text{threshold}_4$ | $p_{12} < \text{threshold}_5$ and $p_{13} < \text{threshold}_5$ | $p_{13} < \text{threshold}_6$             |

$p_i$  = p-value at generation i

$$\text{Threshold}_j = (0.05 / 15,259)^{1/(6-j+1)}$$

| <b>Table S2. QTL for Alcohol Preference/Consumption in the 2-Bottle Choice Paradigm</b> |                    |        |                                                                                                  |
|-----------------------------------------------------------------------------------------|--------------------|--------|--------------------------------------------------------------------------------------------------|
| Chr                                                                                     | Mb Range (NCBIM37) |        | Source                                                                                           |
| 1                                                                                       | 1.80               | 13.57  | Bice et al 2011                                                                                  |
| 1                                                                                       | 95.13              | 108.62 | Bice et al 2011                                                                                  |
| 1                                                                                       | 128.78             | 134.67 | Bice et al 2011                                                                                  |
| 2                                                                                       | 3.45               | 146.16 | Belknap and Atkins 2001; Rodriguez et al 1995: 65.9-91.9                                         |
| 3                                                                                       | 0.00               | 224.84 | Belknap and Atkins 2001; Bice et al 2011: 128.52-129.96, 137.82-138.00, 145.36-145.46            |
| 4                                                                                       | 52.01              | 202.78 | Belknap and Atkins 2001                                                                          |
| 7                                                                                       | 114.40             | 136.30 | Rodriguez et al 1995                                                                             |
| 9                                                                                       | 0.00               | 113.49 | Belknap and Atkins 2001; Bice et al 2011: 60.60-62.71, 68.52-70.67, 102.48-103.09, 106.47-110.94 |
| 11                                                                                      | 91.50              | 111.50 | Rodriguez et al 1995                                                                             |
| 12                                                                                      | 80.10              | 100.10 | Rodriguez et al 1995                                                                             |



**Table S3. Transcripts with maintained differential expression across generations**

| Probe Set ID | Gene Symbol   | Physical Location of Probe Set (chromosome: Mb) | Generation Where Significant Differential Expression Began | Generation Where Significant Differential Variation Began (Line of DV) | deQTL Associated With Transcription Levels of Gene - Univariate (chromosome: Mb range) | deQTL Associated with Transcription Levels of Gene-Multivariate Model (Chromosome: Mb range) | proportion of variance in the gene's expression explained by multivariate model | Location of Major eQTL [chromosome: Mb (p-value)] | Difference in Expression at Generation 13 [log 2 difference (p-value)] | Difference in Expression Between HAP1 and LAP1 [log 2 difference (p-value)] | Difference in Expression Between HAP2 and LAP2 [log 2 difference (p-value)] | Difference in Expression Between C57BL/6J and DBA/2J [log 2 difference (p-value)] |
|--------------|---------------|-------------------------------------------------|------------------------------------------------------------|------------------------------------------------------------------------|----------------------------------------------------------------------------------------|----------------------------------------------------------------------------------------------|---------------------------------------------------------------------------------|---------------------------------------------------|------------------------------------------------------------------------|-----------------------------------------------------------------------------|-----------------------------------------------------------------------------|-----------------------------------------------------------------------------------|
| 1419469_at   | Gnb4          | 3:32.48 Mb                                      | 9                                                          |                                                                        |                                                                                        |                                                                                              |                                                                                 | 3:32.48 Mb (0.0080)                               | -0.40 (0.0244)                                                         | 0.08 (0.2346)                                                               | 0.24 (0.0247)                                                               | -0.46 (<0.0001)                                                                   |
| 1421139_a_at | Zfp386        | 12:117.3 Mb                                     | 9                                                          |                                                                        |                                                                                        |                                                                                              |                                                                                 | 12:114.5 Mb (0.3770)                              | -0.75 (<0.0001)                                                        | 0.37 (0.0015)                                                               | -0.76 (<0.0001)                                                             | -0.27 (0.0003)                                                                    |
| 1421907_at   | Med1          | 11:98.02 Mb                                     | 10                                                         |                                                                        |                                                                                        |                                                                                              |                                                                                 | 11:98.78 Mb (0.0700)                              | -0.48 (0.0117)                                                         | 0.11 (0.0651)                                                               | 0.31 (0.0161)                                                               | 0.54 (<0.0001)                                                                    |
| 1424737_at   | Thrsp         | 7:104.56 Mb                                     | 10                                                         |                                                                        |                                                                                        |                                                                                              |                                                                                 | 7:103.13 Mb (0.0020)                              | 0.72 (<0.0001)                                                         | 0.80 (<0.0001)                                                              | -0.07 (0.4164)                                                              | 0.75 (<0.0001)                                                                    |
| 1426288_at   | Lrp4          | 2:91.35 Mb                                      | 6                                                          |                                                                        |                                                                                        |                                                                                              |                                                                                 | 2:88.19 Mb (0.8180)                               | 0.23 (0.0765)                                                          | 0.80 (<0.0001)                                                              | 0.20 (0.3985)                                                               | 0.53 (<0.0001)                                                                    |
| 1428692_at   | Hddc3         | 7:87.49 Mb                                      | 6                                                          |                                                                        |                                                                                        |                                                                                              |                                                                                 | 7:81.49 Mb (<0.0001)                              | 0.84 (0.0029)                                                          | -0.27 (0.1068)                                                              | 0.64 (0.0127)                                                               | -1.31 (<0.0001)                                                                   |
| 1428889_at   | Alkbh3        | 2:93.82 Mb                                      | 6                                                          |                                                                        |                                                                                        |                                                                                              |                                                                                 | 5:84.27 Mb (0.6130)                               | -0.48 (0.0001)                                                         | -0.63 (0.0001)                                                              | 0.16 (0.3836)                                                               | 0.09 (0.1647)                                                                     |
| 1429215_at   |               | 12:117.62 Mb                                    | 9                                                          |                                                                        |                                                                                        |                                                                                              |                                                                                 | 12:115.17 Mb (0.0105)                             | -0.67 (0.0002)                                                         | 0.09 (0.3458)                                                               | -0.60 (0.0007)                                                              | 0.61 (<0.0001)                                                                    |
| 1429410_at   | Eny2          | 15:44.27 Mb                                     | 10                                                         |                                                                        |                                                                                        |                                                                                              |                                                                                 | 3:23.72 Mb (0.0730)                               | -0.32 (0.0004)                                                         | 0.01 (0.8867)                                                               | 0.56 (0.0086)                                                               | -0.42 (0.0008)                                                                    |
| 1429441_at   | Fbxo30        | 10:11.02 Mb                                     | 6                                                          |                                                                        |                                                                                        |                                                                                              |                                                                                 | 8:120.9 Mb (0.6580)                               | -0.14 (0.0713)                                                         | -0.04 (0.5829)                                                              | 0.06 (0.4337)                                                               | -0.06 (0.1773)                                                                    |
| 1429902_at   | Tcf12         | 9:71.76 Mb                                      | 6                                                          |                                                                        |                                                                                        |                                                                                              |                                                                                 | 1:73.26 Mb (0.4610)                               | 0.24 (0.0253)                                                          | 0.23 (0.0106)                                                               | 0.71 (0.0021)                                                               | 1.30 (<0.0001)                                                                    |
| 1430368_s_at | 1700019D03Rik | 1:52.98 Mb                                      | 8                                                          |                                                                        |                                                                                        |                                                                                              |                                                                                 | 5:33.93 Mb (0.4270)                               | 0.23 (0.0153)                                                          | 0.15 (0.0354)                                                               | 0.01 (0.9311)                                                               | -0.08 (0.1502)                                                                    |
| 1431266_at   | Gpatch2       | 1:189.06 Mb                                     | 8                                                          | 6 (HAP)                                                                |                                                                                        |                                                                                              |                                                                                 | 1:187 Mb (<0.0001)                                | 0.40 (0.0013)                                                          | -0.07 (0.2809)                                                              | -0.01 (0.7851)                                                              | 0.35 (<0.0001)                                                                    |
| 1434339_at   | Fnbp11        | 3:122.24 Mb                                     | 9                                                          |                                                                        |                                                                                        |                                                                                              |                                                                                 | 3:89.35 Mb (0.2260)                               | -0.24 (0.0104)                                                         | -0.06 (0.2856)                                                              | 0.16 (0.0485)                                                               | 0.18 (0.0067)                                                                     |
| 1435606_at   | Gal3st4       | 5:138.71 Mb                                     | 8                                                          |                                                                        |                                                                                        |                                                                                              |                                                                                 | 3:74.54 Mb (0.8470)                               | -0.18 (0.0449)                                                         | 0.00 (0.9430)                                                               | -0.16 (0.0281)                                                              | 0.05 (0.3074)                                                                     |
| 1436145_at   | 2410003K15Rik | 6:49.03 Mb                                      | 10                                                         |                                                                        |                                                                                        |                                                                                              |                                                                                 | 3:36.74 Mb (0.8230)                               | -0.36 (0.0023)                                                         | 0.02 (0.7030)                                                               | -0.24 (0.0741)                                                              | 0.46 (0.0014)                                                                     |
| 1438249_at   | Usp7          | 16:8.7 Mb                                       | 9                                                          |                                                                        |                                                                                        |                                                                                              |                                                                                 | 1:73.26 Mb (0.5250)                               | -0.29 (0.0226)                                                         | -0.03 (0.7616)                                                              | 0.47 (0.0009)                                                               | -0.21 (0.0013)                                                                    |
| 1439138_at   | 2310035C23Rik | 1:107.59 Mb                                     | 6                                                          |                                                                        |                                                                                        |                                                                                              |                                                                                 | 14:8.85 Mb (0.7210)                               | -0.98 (0.0003)                                                         | 0.03 (0.6960)                                                               | 0.06 (0.5473)                                                               | -0.74 (<0.0001)                                                                   |
| 1440091_at   | Meis2         | 2:115.82 Mb                                     | 10                                                         |                                                                        |                                                                                        |                                                                                              |                                                                                 | 1:126.52 Mb (0.9020)                              | -0.45 (0.0027)                                                         | 0.23 (0.0048)                                                               | 0.78 (<0.0001)                                                              | -0.30 (0.1542)                                                                    |

**Table S3. Transcripts with maintained differential expression across generations**

| Probe Set ID | Gene Symbol | Physical Location of Probe Set (chromosome: Mb) | Generation Where Significant Differential Expression Began | Generation Where Significant Differential Variation Began (Line of DV) | deQTL Associated With Transcription Levels of Gene - Univariate (chromosome: Mb range) | deQTL Associated with Transcription Levels of Gene-Multivariate Model (Chromosome: Mb range) | proportion of variance in the gene's expression explained by multivariate model | Location of Major eQTL [chromosome: Mb (p-value)] | Difference in Expression at Generation 13 [log 2 difference (p-value)] | Difference in Expression Between HAP1 and LAP1 [log 2 difference (p-value)] | Difference in Expression Between HAP2 and LAP2 [log 2 difference (p-value)] | Difference in Expression Between C57BL/6J and DBA/2J [log 2 difference (p-value)] |
|--------------|-------------|-------------------------------------------------|------------------------------------------------------------|------------------------------------------------------------------------|----------------------------------------------------------------------------------------|----------------------------------------------------------------------------------------------|---------------------------------------------------------------------------------|---------------------------------------------------|------------------------------------------------------------------------|-----------------------------------------------------------------------------|-----------------------------------------------------------------------------|-----------------------------------------------------------------------------------|
| 1440153_at   |             | 16:84.95 Mb                                     | 6                                                          |                                                                        |                                                                                        |                                                                                              |                                                                                 | 19:21.21 Mb (0.2360)                              | 0.28 (0.0146)                                                          | -0.14 (0.1679)                                                              | 0.00 (0.9567)                                                               | 0.20 (0.0121)                                                                     |
| 1441238_at   | Pds5a       | 5:66.05 Mb                                      | 8                                                          |                                                                        |                                                                                        |                                                                                              |                                                                                 | 5:65.14 Mb (<0.0001)                              | -0.52 (0.0100)                                                         | 0.30 (0.0001)                                                               | 0.04 (0.7817)                                                               | 0.93 (<0.0001)                                                                    |
| 1443745_s_at | Dmp1        | 5:104.64 Mb                                     | 8                                                          |                                                                        |                                                                                        |                                                                                              |                                                                                 | 5:13.82 Mb (0.3490)                               | 0.87 (0.0015)                                                          | 0.08 (0.5280)                                                               | 0.29 (0.0982)                                                               | 0.39 (0.0033)                                                                     |
| 1444620_at   | Tcf12       | 9:71.9 Mb                                       | 8                                                          |                                                                        |                                                                                        |                                                                                              |                                                                                 | 9:71.41 Mb (0.0022)                               | 0.27 (0.0706)                                                          | 0.22 (0.0019)                                                               | 0.19 (0.0082)                                                               | 0.56 (0.0001)                                                                     |
| 1448096_at   | Ogfod1      | 8:96.56 Mb                                      | 9                                                          |                                                                        |                                                                                        |                                                                                              |                                                                                 | 19:59.53 Mb (0.3370)                              | -0.27 (0.0064)                                                         | 0.12 (0.0485)                                                               | 0.28 (0.0054)                                                               | 0.04 (0.4166)                                                                     |
| 1448793_a_at | Sdc4        | 2:164.25 Mb                                     | 6                                                          | 6 (HAP)                                                                |                                                                                        |                                                                                              |                                                                                 | 12:101.87 Mb (0.4380)                             | 1.51 (0.0008)                                                          | 0.73 (<0.0001)                                                              | 1.25 (0.0060)                                                               | 0.39 (0.0001)                                                                     |
| 1449018_at   |             | :NA Mb                                          | 6                                                          |                                                                        |                                                                                        |                                                                                              |                                                                                 | 11:62.07 Mb (0.0030)                              | -0.40 (0.0421)                                                         | -0.53 (<0.0001)                                                             | 0.14 (0.4229)                                                               | -0.47 (<0.0001)                                                                   |
| 1451146_at   | Zfp386      | 12:117.3 Mb                                     | 9                                                          |                                                                        |                                                                                        |                                                                                              |                                                                                 | 5:3.14 Mb (0.6380)                                | -0.81 (<0.0001)                                                        | 0.42 (0.0009)                                                               | -0.84 (<0.0001)                                                             | -0.26 (0.0013)                                                                    |
| 1451506_at   | Mef2c       | 13:83.8 Mb                                      | 9                                                          |                                                                        |                                                                                        |                                                                                              |                                                                                 | 1:43.8 Mb (0.4070)                                | -0.23 (0.0334)                                                         | -0.11 (0.1054)                                                              | 0.23 (0.0726)                                                               | 0.13 (0.1945)                                                                     |
| 1452379_at   | Auts2       | 5:131.92 Mb                                     | 10                                                         |                                                                        |                                                                                        |                                                                                              |                                                                                 | 2:9.75 Mb (0.0080)                                | -0.36 (0.0004)                                                         | 0.29 (0.0001)                                                               | 0.26 (0.0279)                                                               | 0.03 (0.5370)                                                                     |
| 1456387_at   | Nol4        | 18:22.85 Mb                                     | 9                                                          |                                                                        |                                                                                        |                                                                                              |                                                                                 | 18:16.57 Mb (0.0040)                              | -0.30 (0.0048)                                                         | 0.26 (0.0012)                                                               | -0.01 (0.9269)                                                              | -0.78 (<0.0001)                                                                   |
| 1458129_at   | Rora        | 9:69.23 Mb                                      | 6                                                          |                                                                        |                                                                                        |                                                                                              |                                                                                 | 3:23.72 Mb (0.1160)                               | 1.07 (<0.0001)                                                         | 0.27 (0.0021)                                                               | 0.66 (0.0003)                                                               | -0.28 (0.0103)                                                                    |
| 1459307_at   | Sec24b      | 3:129.73 Mb                                     | 6                                                          | 6 (LAP)                                                                |                                                                                        |                                                                                              |                                                                                 | 2:16.23 Mb (0.5850)                               | -0.19 (0.0369)                                                         | -0.10 (0.1868)                                                              | 0.55 (0.0044)                                                               | -0.17 (0.0076)                                                                    |
| 1417355_at   | Peg3        | 7:6.66 Mb                                       | 8                                                          | 6 (HAP)                                                                |                                                                                        | rs3669485 (1:13.98 - 20.77)                                                                  | 0.14                                                                            | 3:23.72 Mb (0.0920)                               | 1.33 (0.0009)                                                          | -1.22 (<0.0001)                                                             | 0.11 (0.7723)                                                               | -0.09 (0.1830)                                                                    |
| 1437901_a_at | Vps41       | 13:18.92 Mb                                     | 6                                                          |                                                                        | rs6241342 (7:126.33 - 126.33)                                                          | rs6241342 (7:126.33 - 126.33)                                                                | 0.15                                                                            | 12:82.69 Mb (0.6730)                              | -0.35 (0.0001)                                                         | 0.36 (0.0002)                                                               | 0.00 (0.9705)                                                               | -0.03 (0.6501)                                                                    |
| 1456293_s_at | Ccnh        | 13:85.35 Mb                                     | 6                                                          |                                                                        | rs6241342 (7:126.33 - 126.33)                                                          | rs6241342 (7:126.33 - 126.33)                                                                | 0.15                                                                            | 8:14.76 Mb (0.2070)                               | 0.13 (0.0749)                                                          | 0.25 (0.0005)                                                               | 0.06 (0.4168)                                                               | -0.09 (0.2205)                                                                    |
| 1443037_at   | Nptn        | 9:58.47 Mb                                      | 9                                                          |                                                                        |                                                                                        | rs13478906 (6:92.57 - 98.03)                                                                 | 0.16                                                                            | 10:64.17 Mb (0.2800)                              | -0.28 (0.0026)                                                         | 0.07 (0.3292)                                                               | 0.36 (0.0006)                                                               | 0.01 (0.8302)                                                                     |
| 1423179_at   | Kcnb1       | 2:166.93 Mb                                     | 10                                                         |                                                                        |                                                                                        | CEL-                                                                                         | 0.17                                                                            | 2:165.61 Mb                                       | -0.36                                                                  | -0.08                                                                       | -0.03                                                                       | -0.02                                                                             |

**Table S3. Transcripts with maintained differential expression across generations**

| Probe Set ID | Gene Symbol | Physical Location of Probe Set (chromosome: Mb) | Generation Where Significant Differential Expression Began | Generation Where Significant Differential Variation Began (Line of DV) | deQTL Associated With Transcription Levels of Gene - Univariate (chromosome: Mb range) | deQTL Associated with Transcription Levels of Gene- Multivariate Model (Chromosome: Mb range) | proportion of variance in the gene's expression explained by multivariate model | Location of Major eQTL [chromosome: Mb (p-value)] | Difference in Expression at Generation 13 [log 2 difference (p-value)] | Difference in Expression Between HAP1 and LAP1 [log 2 difference (p-value)] | Difference in Expression Between HAP2 and LAP2 [log 2 difference (p-value)] | Difference in Expression Between C57BL/6J and DBA/2J [log 2 difference (p-value)] |
|--------------|-------------|-------------------------------------------------|------------------------------------------------------------|------------------------------------------------------------------------|----------------------------------------------------------------------------------------|-----------------------------------------------------------------------------------------------|---------------------------------------------------------------------------------|---------------------------------------------------|------------------------------------------------------------------------|-----------------------------------------------------------------------------|-----------------------------------------------------------------------------|-----------------------------------------------------------------------------------|
|              |             |                                                 |                                                            |                                                                        |                                                                                        | 9_29909656 (9:29.75 - 40.27)                                                                  |                                                                                 | (0.2280)                                          | (0.0013)                                                               | (0.4057)                                                                    | (0.8444)                                                                    | (0.7767)                                                                          |
| 1440915_at   | Mphosph9    | 5:124.7 Mb                                      | 8                                                          |                                                                        |                                                                                        | rs3669485 (1:13.98 - 20.77)                                                                   | 0.17                                                                            | 5:123.74 Mb (0.0025)                              | -0.50 (<0.0001)                                                        | -0.14 (0.0438)                                                              | 0.08 (0.3059)                                                               | -0.34 (<0.0001)                                                                   |
| 1442358_at   | Rnf169      | 7:107.11 Mb                                     | 10                                                         | 6 (HAP)                                                                |                                                                                        | CEL-9_29909656 (9:29.75 - 40.27)                                                              | 0.18                                                                            | 9:56.7 Mb (0.7350)                                | -0.39 (0.0001)                                                         | -0.08 (0.2175)                                                              | 0.50 (0.0006)                                                               | -0.39 (0.0001)                                                                    |
| 1434374_at   | Fam168a     | 7:107.99 Mb                                     | 8                                                          |                                                                        |                                                                                        | rs3669485 (1:13.98 - 20.77)                                                                   | 0.19                                                                            | 7:103.13 Mb (0.0930)                              | 0.88 (<0.0001)                                                         | 0.13 (0.0476)                                                               | 0.00 (0.9709)                                                               | 0.10 (0.1418)                                                                     |
| 1458010_at   |             | 4:77.46 Mb                                      | 9                                                          | 6 (LAP)                                                                |                                                                                        | rs13478906 (6:92.57 - 98.03)                                                                  | 0.19                                                                            | 7:103.13 Mb (0.3590)                              | -0.66 (0.0005)                                                         | 0.24 (0.2790)                                                               | -0.34 (0.2084)                                                              | -0.38 (0.0005)                                                                    |
| 1455993_at   | Odz4        | 7:104.06 Mb                                     | 13                                                         |                                                                        | rs3659787 (11:4.41 - 16.85)<br>rs13479416 (7:95.16 - 121.84)                           | rs13479416 (7:95.16 - 121.84)                                                                 | 0.20                                                                            | 7:117.12 Mb (0.3440)                              | -0.92 (<0.0001)                                                        | 0.41 (0.0045)                                                               | 0.50 (0.0002)                                                               | -0.83 (<0.0001)                                                                   |
| 1434375_at   | Fam168a     | 7:107.99 Mb                                     | 8                                                          | 8 (HAP)                                                                |                                                                                        | rs3669485 (1:13.98 - 20.77)                                                                   | 0.20                                                                            | 7:103.13 Mb (<0.0001)                             | 1.20 (<0.0001)                                                         | -0.02 (0.7331)                                                              | 0.07 (0.4214)                                                               | 1.28 (<0.0001)                                                                    |
| 1447864_s_at | Pogk        | 1:168.33 Mb                                     | 6                                                          |                                                                        | gnf18.021.931 (18:24.6 - 24.6)                                                         | gnf18.021.931 (18:24.6 - 24.6)                                                                | 0.21                                                                            | 1:147.39 Mb (0.0003)                              | 0.21 (0.0423)                                                          | -0.14 (0.0514)                                                              | 0.19 (0.1154)                                                               | -0.37 (<0.0001)                                                                   |
| 1459464_at   | Macf1       | 4:123.32 Mb                                     | 9                                                          |                                                                        |                                                                                        | rs13478906 (6:92.57 - 98.03)                                                                  | 0.22                                                                            | 14:8.85 Mb (0.5390)                               | -0.22 (0.0110)                                                         | 0.78 (<0.0001)                                                              | -0.01 (0.9764)                                                              | 0.39 (0.0014)                                                                     |
| 1431053_at   | Mphosph9    | 5:124.7 Mb                                      | 6                                                          |                                                                        | gnf18.021.931 (18:24.6 - 24.6)<br>rs13477323 (3:109.4 - 141.7)                         | rs13477323 (3:109.4 - 141.7)                                                                  | 0.25                                                                            | 5:119.76 Mb (0.0370)                              | -1.13 (<0.0001)                                                        | -0.01 (0.9403)                                                              | -0.09 (0.5472)                                                              | -1.13 (<0.0001)                                                                   |
| 1455441_at   | Map3k7      | 4:32.11 Mb                                      | 6                                                          |                                                                        | rs3701432 (4:29.19 - 34.04)                                                            | rs3701432 (4:29.19 - 34.04)                                                                   | 0.28                                                                            | 4:31.65 Mb (0.1480)                               | -0.24 (0.0042)                                                         | 0.15 (0.0154)                                                               | 0.02 (0.7304)                                                               | 0.18 (0.0007)                                                                     |

**Table S3. Transcripts with maintained differential expression across generations**

| Probe Set ID | Gene Symbol | Physical Location of Probe Set (chromosome: Mb) | Generation Where Significant Differential Expression Began | Generation Where Significant Differential Variation Began (Line of DV) | deQTL Associated With Transcription Levels of Gene - Univariate (chromosome: Mb range)           | deQTL Associated with Transcription Levels of Gene- Multivariate Model (Chromosome: Mb range) | proportion of variance in the gene's expression explained by multivariate model | Location of Major eQTL [chromosome: Mb (p-value)] | Difference in Expression at Generation 13 [log 2 difference (p-value)] | Difference in Expression Between HAP1 and LAP1 [log 2 difference (p-value)] | Difference in Expression Between HAP2 and LAP2 [log 2 difference (p-value)] | Difference in Expression Between C57BL/6J and DBA/2J [log 2 difference (p-value)] |
|--------------|-------------|-------------------------------------------------|------------------------------------------------------------|------------------------------------------------------------------------|--------------------------------------------------------------------------------------------------|-----------------------------------------------------------------------------------------------|---------------------------------------------------------------------------------|---------------------------------------------------|------------------------------------------------------------------------|-----------------------------------------------------------------------------|-----------------------------------------------------------------------------|-----------------------------------------------------------------------------------|
| 1443621_at   | Xaf1        | 11:72.13 Mb                                     | 6                                                          |                                                                        | rs13478067 (4:154.37 - 155.38)                                                                   | rs13478067 (4:154.37 - 155.38)<br>rs6241342 (7:126.33 - 126.33)                               | 0.28                                                                            | 11:69.42 Mb (<0.0001)                             | -0.42 (0.0002)                                                         | -0.93 (<0.0001)                                                             | -0.14 (0.7667)                                                              | -0.72 (<0.0001)                                                                   |
| 1456257_at   | Fam126b     | 1:58.58 Mb                                      | 9                                                          |                                                                        |                                                                                                  | rs13478906 (6:92.57 - 98.03)                                                                  | 0.29                                                                            | 1:57.88 Mb (0.0001)                               | -0.88 (0.0284)                                                         | 0.40 (0.0092)                                                               | -0.48 (0.0121)                                                              | 1.34 (<0.0001)                                                                    |
| 1451457_at   | Sc5d        | 9:42.06 Mb                                      | 10                                                         | 9 (LAP)                                                                |                                                                                                  | CEL-9_29909656 (9:29.75 - 40.27)                                                              | 0.30                                                                            | 9:41.47 Mb (0.0001)                               | 0.71 (0.0090)                                                          | 0.05 (0.7470)                                                               | 0.34 (0.1235)                                                               | 2.29 (<0.0001)                                                                    |
| 1425795_a_at | Map3k7      | 4:32.11 Mb                                      | 6                                                          |                                                                        | rs3701432 (4:29.19 - 34.04)<br>rs13478067 (4:154.37 - 155.38)                                    | rs3701432 (4:29.19 - 34.04)<br>rs13478067 (4:154.37 - 155.38)                                 | 0.50                                                                            | 4:31.65 Mb (0.0260)                               | -0.39 (0.0004)                                                         | 0.42 (0.0002)                                                               | 0.08 (0.4502)                                                               | 0.23 (0.0032)                                                                     |
| 1419988_at   | Map3k7      | 4:32.11 Mb                                      | 6                                                          |                                                                        | rs3701432 (4:29.19 - 34.04)                                                                      | rs3701432 (4:29.19 - 34.04)                                                                   | 0.62                                                                            | 4:31.65 Mb (<0.0001)                              | -0.33 (0.0005)                                                         | 0.29 (0.0006)                                                               | 0.06 (0.5031)                                                               | 0.30 (0.0006)                                                                     |
| 1444507_at   | Usp53       | 3:122.69 Mb                                     | 6                                                          | 6 (LAP)                                                                | gnf18.021.931 (18:24.6 - 24.6)<br>rs13477323 (3:109.4 - 141.7)<br>rs13478067 (4:154.37 - 155.38) | rs13477323 (3:109.4 - 141.7)<br>rs13478067 (4:154.37 - 155.38)                                | 0.73                                                                            | 3:118.29 Mb (<0.0001)                             | -0.47 (<0.0001)                                                        | -0.17 (0.0736)                                                              | 0.57 (<0.0001)                                                              | 0.46 (<0.0001)                                                                    |
| 1454696_at   | Gnb1        | 4:154.93 Mb                                     | 6                                                          | 6 (LAP)                                                                | rs13478067 (4:154.37 - 155.38)                                                                   | rs13478067 (4:154.37 - 155.38)                                                                | 0.74                                                                            | 4:155.24 Mb (<0.0001)                             | -1.98 (<0.0001)                                                        | -1.61 (<0.0001)                                                             | -1.09 (<0.0001)                                                             | -1.36 (<0.0001)                                                                   |
| 1417432_a_at | Gnb1        | 4:154.93 Mb                                     | 6                                                          |                                                                        | rs13478067 (4:154.37 - 155.38)                                                                   | rs13478067 (4:154.37 - 155.38)                                                                | 0.85                                                                            | 4:154.88 Mb (<0.0001)                             | -1.16 (<0.0001)                                                        | -1.12 (<0.0001)                                                             | -1.36 (<0.0001)                                                             | -1.67 (<0.0001)                                                                   |
| 1438435_at   | Acer3       | 7:105.36 Mb                                     | 13                                                         | 8 (HAP)                                                                | rs3659787 (11:4.41 - 16.85)<br>rs13479416                                                        | rs13479416 (7:95.16 - 121.84)                                                                 | 0.98                                                                            | 7:103.13 Mb (<0.0001)                             | 1.46 (<0.0001)                                                         | 1.82 (<0.0001)                                                              | -0.22 (0.1782)                                                              | 1.67 (<0.0001)                                                                    |

**Table S3. Transcripts with maintained differential expression across generations**

| Probe Set ID | Gene Symbol   | Physical Location of Probe Set (chromosome: Mb) | Generation Where Significant Differential Expression Began | Generation Where Significant Differential Variation Began (Line of DV) | deQTL Associated With Transcription Levels of Gene - Univariate (chromosome: Mb range) | deQTL Associated with Transcription Levels of Gene-Multivariate Model (Chromosome: Mb range) | proportion of variance in the gene's expression explained by multivariate model | Location of Major eQTL [chromosome: Mb (p-value)] | Difference in Expression at Generation 13 [log 2 difference (p-value)] | Difference in Expression Between HAP1 and LAP1 [log 2 difference (p-value)] | Difference in Expression Between HAP2 and LAP2 [log 2 difference (p-value)] | Difference in Expression Between C57BL/6J and DBA/2J [log 2 difference (p-value)] |
|--------------|---------------|-------------------------------------------------|------------------------------------------------------------|------------------------------------------------------------------------|----------------------------------------------------------------------------------------|----------------------------------------------------------------------------------------------|---------------------------------------------------------------------------------|---------------------------------------------------|------------------------------------------------------------------------|-----------------------------------------------------------------------------|-----------------------------------------------------------------------------|-----------------------------------------------------------------------------------|
|              |               |                                                 |                                                            |                                                                        | (7:95.16 - 121.84)                                                                     |                                                                                              |                                                                                 |                                                   |                                                                        |                                                                             |                                                                             |                                                                                   |
| 1424410_at   | Ttc8          | 12:100.22 Mb                                    | 12                                                         |                                                                        |                                                                                        |                                                                                              |                                                                                 | 19:4.85 Mb (0.7270)                               | -0.38 (0.0005)                                                         | 0.15 (0.0394)                                                               | 0.15 (0.1132)                                                               | -0.08 (0.2075)                                                                    |
| 1426766_at   | 6330403K07Rik | 11:70.85 Mb                                     | 12                                                         |                                                                        |                                                                                        |                                                                                              |                                                                                 | 11:116.91 Mb (0.6690)                             | -0.32 (0.0007)                                                         | 0.06 (0.2548)                                                               | 0.03 (0.6437)                                                               | -0.37 (0.0007)                                                                    |
| 1430183_at   | Pbx1          | 1:170.35 Mb                                     | 12                                                         |                                                                        |                                                                                        |                                                                                              |                                                                                 | 2:16.23 Mb (0.0014)                               | -0.40 (0.0012)                                                         | 0.28 (0.0074)                                                               | 0.70 (0.0009)                                                               | -0.35 (0.0194)                                                                    |
| 1434909_at   | Rragd         | 4:33.11 Mb                                      | 12                                                         |                                                                        |                                                                                        |                                                                                              |                                                                                 | 4:29.19 Mb (0.0008)                               | -0.37 (0.0012)                                                         | 0.10 (0.0743)                                                               | 0.26 (0.0065)                                                               | 0.16 (0.0621)                                                                     |
| 1436325_at   | Rora          | 9:69.23 Mb                                      | 12                                                         |                                                                        |                                                                                        |                                                                                              |                                                                                 | 15:63.15 Mb (0.5980)                              | 0.57 (<0.0001)                                                         | 0.31 (0.0001)                                                               | 0.26 (0.0460)                                                               | -0.15 (0.0326)                                                                    |
| 1442489_at   | Agfg1         | 1:82.88 Mb                                      | 12                                                         |                                                                        |                                                                                        |                                                                                              |                                                                                 | 3:23.72 Mb (0.2070)                               | -0.42 (0.0015)                                                         | -0.39 (0.0004)                                                              | 0.46 (0.0192)                                                               | 0.10 (0.4658)                                                                     |
| 1450843_at   | Serpinh1      | 7:106.49 Mb                                     | 12                                                         |                                                                        |                                                                                        |                                                                                              |                                                                                 | 7:103.13 Mb (0.0100)                              | 0.56 (0.0001)                                                          | 0.28 (0.0018)                                                               | -0.07 (0.4130)                                                              | 0.45 (<0.0001)                                                                    |
| 1451458_at   | Tmem2         | 19:21.93 Mb                                     | 12                                                         |                                                                        |                                                                                        |                                                                                              |                                                                                 | 12:37.6 Mb (0.2200)                               | -0.29 (0.0015)                                                         | 0.07 (0.3567)                                                               | 0.17 (0.0733)                                                               | 0.01 (0.9054)                                                                     |
| 1452330_at   | Mxra8         | 4:155.22 Mb                                     | 12                                                         | 6 (LAP)                                                                |                                                                                        |                                                                                              |                                                                                 | 4:155.24 Mb (<0.0001)                             | -0.34 (0.0003)                                                         | -0.29 (0.0001)                                                              | -0.40 (0.0002)                                                              | -0.22 (0.0002)                                                                    |
| 1454639_at   | Rpl41         | 10:127.99 Mb                                    | 12                                                         |                                                                        |                                                                                        |                                                                                              |                                                                                 | 2:50.5 Mb (0.0270)                                | -0.45 (<0.0001)                                                        | 0.31 (0.0008)                                                               | 0.12 (0.1332)                                                               | -0.20 (0.0029)                                                                    |
| 1454902_at   | Prkcz         | 4:154.63 Mb                                     | 12                                                         |                                                                        |                                                                                        |                                                                                              |                                                                                 | 4:150.31 Mb (0.2840)                              | 0.56 (0.0009)                                                          | 0.27 (0.0004)                                                               | 0.25 (0.0002)                                                               | 0.06 (0.2434)                                                                     |
| 1456216_at   | Csnk1a1       | 18:61.72 Mb                                     | 12                                                         |                                                                        |                                                                                        |                                                                                              |                                                                                 | 1:45.57 Mb (0.8720)                               | -0.29 (0.0008)                                                         | 0.00 (0.9844)                                                               | 0.11 (0.2381)                                                               | 0.05 (0.4074)                                                                     |
| 1456735_at   | Acpl2         | 9:96.72 Mb                                      | 12                                                         |                                                                        |                                                                                        |                                                                                              |                                                                                 | 2:128.2 Mb (0.6660)                               | -0.49 (0.0001)                                                         | -0.49 (0.0001)                                                              | -0.24 (0.2580)                                                              | -0.21 (0.0055)                                                                    |
| 1459844_at   | Tnip2         | 5:34.84 Mb                                      | 12                                                         |                                                                        |                                                                                        |                                                                                              |                                                                                 | 5:84.27 Mb (0.9790)                               | -0.59 (0.0002)                                                         | -0.02 (0.7094)                                                              | 0.13 (0.3988)                                                               | -0.12 (0.3530)                                                                    |

**Table S4. Transcripts with maintained reduced variation across generations (compared to starting heterogeneous stock)**

| Probe Set ID | Gene Symbol   | Physical Location of Probe Set (chromosome: Mb) | Generation Where Significant Differential Expression Began | Generation Where Significant Variation Began (Line of DV) | Location of Major eQTL [chromosome:Mb (p-value)] | Difference in Expression at Generation 13 [log 2 difference (p-value)] |
|--------------|---------------|-------------------------------------------------|------------------------------------------------------------|-----------------------------------------------------------|--------------------------------------------------|------------------------------------------------------------------------|
| 1430136_at   | Grm3          | 5:9.49 Mb                                       |                                                            | 6 (HAP)<br>6 (LAP)                                        | 2:13.36 Mb (0.0840)                              | 0.04 (0.6565)                                                          |
| 1451728_at   | Wdr13         | X:7.7 Mb                                        |                                                            | 6 (HAP)<br>6 (LAP)                                        | 8:129.11 Mb (0.0700)                             | -0.04 (0.5260)                                                         |
| 1417211_a_at | 1110032A03Rik | 9:50.57 Mb                                      |                                                            | 6 (HAP)                                                   | 9:46.34 Mb (0.0005)                              | 0.05 (0.6421)                                                          |
| 1417355_at   | Peg3          | 7:6.66 Mb                                       | 8                                                          | 6 (HAP)                                                   | 3:23.72 Mb (0.0920)                              | 1.33 (0.0009)                                                          |
| 1420537_at   | Gtf2f2        | 14:76.36 Mb                                     |                                                            | 6 (HAP)                                                   | 18:73.59 Mb (0.6750)                             | -0.05 (0.5262)                                                         |
| 1420994_at   | B3gnt5        | 16:19.77 Mb                                     |                                                            | 6 (HAP)                                                   | 19:21.21 Mb (0.5990)                             | -0.26 (0.0253)                                                         |
| 1422165_at   |               | X:108.01 Mb                                     |                                                            | 6 (HAP)                                                   | 18:49.45 Mb (0.1420)                             | 0.01 (0.9015)                                                          |
| 1422773_at   | Myt1          | 2:181.56 Mb                                     |                                                            | 6 (HAP)                                                   | 8:98.23 Mb (0.7800)                              | -0.23 (0.0088)                                                         |
| 1423894_a_at | Dalrd3        | 9:108.47 Mb                                     |                                                            | 6 (HAP)                                                   | 19:38.91 Mb (0.1400)                             | -0.03 (0.7345)                                                         |
| 1424223_at   | 1700020C11Rik | 11:3.99 Mb                                      |                                                            | 6 (HAP)                                                   | 11:47.59 Mb (0.6900)                             | -0.12 (0.1630)                                                         |
| 1424483_at   |               | 6:83.29 Mb                                      |                                                            | 6 (HAP)                                                   | 15:73.96 Mb (0.5090)                             | -0.16 (0.0342)                                                         |
| 1426409_at   | Lzts2         | 19:45.1 Mb                                      |                                                            | 6 (HAP)                                                   | 14:63.11 Mb (0.0004)                             | -0.11 (0.1504)                                                         |
| 1426890_a_at | Rpap1         | 2:119.59 Mb                                     |                                                            | 6 (HAP)                                                   | 2:117.12 Mb (0.0110)                             | 0.05 (0.6217)                                                          |
| 1428101_at   | Rnf38         | 4:44.14 Mb                                      |                                                            | 6 (HAP)                                                   | 4:40.97 Mb (0.0016)                              | 0.20 (0.0278)                                                          |
| 1428351_at   | Ppm1m         | 9:106.1 Mb                                      |                                                            | 6 (HAP)                                                   | 9:105.82 Mb (0.0670)                             | -0.13 (0.0922)                                                         |
| 1428636_at   | Steap2        | 5:5.67 Mb                                       |                                                            | 6 (HAP)                                                   | 12:97.34 Mb (0.0670)                             | -0.13 (0.1388)                                                         |
| 1431266_at   | Gpatch2       | 1:189.06 Mb                                     | 8                                                          | 6 (HAP)                                                   | 1:187 Mb (<0.0001)                               | 0.40 (0.0013)                                                          |
| 1433571_at   | Serinc5       | 13:93.48 Mb                                     |                                                            | 6 (HAP)                                                   | 11:116.91 Mb (0.0500)                            | -0.15 (0.2009)                                                         |
| 1434210_s_at | Lrig1         | 6:94.55 Mb                                      |                                                            | 6 (HAP)                                                   | 8:89.79 Mb (0.4970)                              | -0.13 (0.0888)                                                         |
| 1434416_a_at |               | 17:26.1 Mb                                      |                                                            | 6 (HAP)                                                   | 7:103.13 Mb (0.0660)                             | -0.18 (0.0218)                                                         |
| 1434612_s_at | Sbno1         | 5:124.82 Mb                                     |                                                            | 6 (HAP)                                                   | 5:40.03 Mb (0.1770)                              | 0.07 (0.3309)                                                          |
| 1434648_a_at | Ccm2          | 11:6.5 Mb                                       |                                                            | 6 (HAP)                                                   | 5:3.14 Mb (0.3930)                               | 0.01 (0.9211)                                                          |
| 1435148_at   | Atp1b2        | 11:69.41 Mb                                     |                                                            | 6 (HAP)                                                   | 1:186.15 Mb (0.6320)                             | -0.13 (0.0748)                                                         |
| 1436183_at   |               | 6:38.26 Mb                                      |                                                            | 6 (HAP)                                                   | 1:183.94 Mb (0.8190)                             | -0.15 (0.0838)                                                         |
| 1436388_a_at | 3830406C13Rik | 14:13.13 Mb                                     |                                                            | 6 (HAP)                                                   | 14:10.59 Mb (0.0020)                             | 0.05 (0.6503)                                                          |
| 1437045_at   | Mapk8         | 14:34.2 Mb                                      |                                                            | 6 (HAP)                                                   | 1:45.57 Mb (0.3660)                              | -0.20 (0.0134)                                                         |
| 1437759_at   | Pfkip         | 13:6.59 Mb                                      |                                                            | 6 (HAP)                                                   | 2:13.36 Mb (0.1340)                              | -0.06 (0.6175)                                                         |
| 1439805_at   | Nfat5         | 8:109.85 Mb                                     |                                                            | 6 (HAP)                                                   | 1:21.63 Mb (0.2820)                              | -0.21 (0.0147)                                                         |
| 1439998_at   | Jmjd1c        | 10:66.65 Mb                                     |                                                            | 6 (HAP)                                                   | 10:64.17 Mb (0.3470)                             | 0.05 (0.5203)                                                          |

**Table S4. Transcripts with maintained reduced variation across generations (compared to starting heterogeneous stock)**

| Probe Set ID | Gene Symbol   | Physical Location of Probe Set (chromosome: Mb) | Generation Where Significant Differential Expression Began | Generation Where Significant Variation Began (Line of DV) | Location of Major eQTL [chromosome:Mb (p-value)] | Difference in Expression at Generation 13 [log 2 difference (p-value)] |
|--------------|---------------|-------------------------------------------------|------------------------------------------------------------|-----------------------------------------------------------|--------------------------------------------------|------------------------------------------------------------------------|
| 1440651_at   | Dusp16        | 6:134.69 Mb                                     |                                                            | 6 (HAP)                                                   | 6:133.92 Mb (<0.0001)                            | -0.23 (0.0193)                                                         |
| 1440830_at   | Gpr116        | 17:43.59 Mb                                     |                                                            | 6 (HAP)                                                   | 11:33.54 Mb (0.2790)                             | -0.17 (0.0224)                                                         |
| 1441266_at   | Strn3         | 12:52.74 Mb                                     |                                                            | 6 (HAP)                                                   | 10:108.82 Mb (0.9810)                            | -0.33 (0.0002)                                                         |
| 1442207_at   |               | 7:108.43 Mb                                     |                                                            | 6 (HAP)                                                   | 7:103.13 Mb (<0.0001)                            | -0.37 (0.0004)                                                         |
| 1442358_at   | Rnf169        | 7:107.11 Mb                                     | 10                                                         | 6 (HAP)                                                   | 9:56.7 Mb (0.7350)                               | -0.39 (0.0001)                                                         |
| 1442760_x_at | Rtn4          | 11:29.62 Mb                                     |                                                            | 6 (HAP)                                                   | 11:21.12 Mb (0.4380)                             | -0.32 (0.0052)                                                         |
| 1443366_at   | Napg          | 18:63.14 Mb                                     |                                                            | 6 (HAP)                                                   | 2:11.71 Mb (0.0200)                              | -0.23 (0.0442)                                                         |
| 1445867_at   | Rsf1          | 7:104.75 Mb                                     |                                                            | 6 (HAP)                                                   | 1:165.32 Mb (0.2820)                             | -0.23 (0.0042)                                                         |
| 1447679_s_at | Bms1          | 6:118.33 Mb                                     |                                                            | 6 (HAP)                                                   | 1:183.94 Mb (0.4480)                             | -0.17 (0.0209)                                                         |
| 1448529_at   | Thbd          | 2:148.23 Mb                                     |                                                            | 6 (HAP)                                                   | 10:27.85 Mb (0.0390)                             | 0.04 (0.5586)                                                          |
| 1448793_a_at | Sdc4          | 2:164.25 Mb                                     | 6                                                          | 6 (HAP)                                                   | 12:101.87 Mb (0.4380)                            | 1.51 (0.0008)                                                          |
| 1449770_x_at | Tmem191c      | 16:17.28 Mb                                     |                                                            | 6 (HAP)                                                   | 1:181.8 Mb (0.5450)                              | -0.19 (0.0291)                                                         |
| 1450985_a_at | Tjp2          | 19:24.17 Mb                                     |                                                            | 6 (HAP)                                                   | 5:72.42 Mb (0.1880)                              | 0.03 (0.6517)                                                          |
| 1451047_at   | Itn2a         | X:104.59 Mb                                     |                                                            | 6 (HAP)                                                   | 12:82.69 Mb (0.6100)                             | -0.02 (0.8035)                                                         |
| 1453109_at   | Arsk          | 13:76.2 Mb                                      |                                                            | 6 (HAP)                                                   | 13:75.9 Mb (0.0017)                              | -0.03 (0.6853)                                                         |
| 1455078_at   |               | 11:77.27 Mb                                     |                                                            | 6 (HAP)                                                   | 19:56.68 Mb (0.4110)                             | -0.11 (0.1015)                                                         |
| 1458700_at   | Lrrc8c        | 5:106.02 Mb                                     |                                                            | 6 (HAP)                                                   | 3:7.68 Mb (0.5590)                               | -0.16 (0.0853)                                                         |
| 1434375_at   | Fam168a       | 7:107.99 Mb                                     | 8                                                          | 8 (HAP)                                                   | 7:103.13 Mb (<0.0001)                            | 1.20 (<0.0001)                                                         |
| 1438435_at   | Acer3         | 7:105.36 Mb                                     | 13                                                         | 8 (HAP)                                                   | 7:103.13 Mb (<0.0001)                            | 1.46 (<0.0001)                                                         |
| 1441577_at   | Efna5         | 17:63.21 Mb                                     |                                                            | 8 (HAP)                                                   | 11:47.59 Mb (0.2160)                             | -0.07 (0.3752)                                                         |
| 1417121_at   | Gabra6        | 11:42.12 Mb                                     |                                                            | 9 (HAP)                                                   | 8:93.35 Mb (0.8220)                              | -0.06 (0.7041)                                                         |
| 1418868_at   | En2           | 5:28.5 Mb                                       |                                                            | 9 (HAP)                                                   | 19:25.74 Mb (0.4090)                             | -0.42 (0.0002)                                                         |
| 1419271_at   | Pax6          | 2:105.54 Mb                                     |                                                            | 9 (HAP)                                                   | 8:129.11 Mb (0.1700)                             | -0.23 (0.0177)                                                         |
| 1423286_at   | Cbln1         | 8:89.99 Mb                                      |                                                            | 9 (HAP)                                                   | 8:93.35 Mb (0.0280)                              | -0.27 (0.0415)                                                         |
| 1423287_at   | Cbln1         | 8:89.99 Mb                                      |                                                            | 9 (HAP)                                                   | 8:93.35 Mb (0.1200)                              | -0.25 (0.0977)                                                         |
| 1423477_at   | Zic1          | 9:91.26 Mb                                      |                                                            | 9 (HAP)                                                   | 9:86.2 Mb (0.0016)                               | -0.26 (0.0031)                                                         |
| 1426412_at   | Neurod1       | 2:79.29 Mb                                      |                                                            | 9 (HAP)                                                   | 19:32.96 Mb (0.4920)                             | 0.12 (0.2296)                                                          |
| 1426413_at   | Neurod1       | 2:79.29 Mb                                      |                                                            | 9 (HAP)                                                   | 1:72.74 Mb (0.9110)                              | 0.00 (0.9972)                                                          |
| 1427482_a_at | Car8          | 4:8.07 Mb                                       |                                                            | 9 (HAP)                                                   | 4:6.82 Mb (0.0016)                               | -0.10 (0.4997)                                                         |
| 1428370_at   | 1500011B03Rik | 5:115.26 Mb                                     |                                                            | 9 (HAP)                                                   | 5:115.6 Mb (<0.0001)                             | 0.20 (0.1396)                                                          |
| 1437205_at   | Tcf25         | 8:125.93 Mb                                     |                                                            | 9 (HAP)                                                   | 2:16.23 Mb (0.2700)                              | -0.24 (0.0064)                                                         |

**Table S4. Transcripts with maintained reduced variation across generations (compared to starting heterogeneous stock)**

| Probe Set ID | Gene Symbol   | Physical Location of Probe Set (chromosome: Mb) | Generation Where Significant Differential Expression Began | Generation Where Significant Differential Variation Began (Line of DV) | Location of Major eQTL [chromosome:Mb (p-value)] | Difference in Expression at Generation 13 [log 2 difference (p-value)] |
|--------------|---------------|-------------------------------------------------|------------------------------------------------------------|------------------------------------------------------------------------|--------------------------------------------------|------------------------------------------------------------------------|
| 1449240_at   | Gsbs          | 6:55.98 Mb                                      |                                                            | 9 (HAP)                                                                | 19:32.96 Mb (0.3710)                             | -0.31 (0.0770)                                                         |
| 1421360_at   | Inpp4a        | :NA Mb                                          |                                                            | 6 (LAP)                                                                | 1:36.05 Mb (0.0001)                              | 0.28 (0.0669)                                                          |
| 1421814_at   | Msn           | X:93.36 Mb                                      |                                                            | 6 (LAP)                                                                | 13:111.23 Mb (0.7490)                            | 0.12 (0.0867)                                                          |
| 1422943_a_at |               | 13:45.17 Mb                                     |                                                            | 6 (LAP)                                                                | 2:179.01 Mb (0.3030)                             | 0.31 (0.0012)                                                          |
| 1436790_a_at | Sox11         | 12:28.02 Mb                                     |                                                            | 6 (LAP)                                                                | 1:60.7 Mb (0.6010)                               | 0.38 (0.0037)                                                          |
| 1437567_at   | Zfp772        | 7:7.15 Mb                                       |                                                            | 6 (LAP)                                                                | 1:173.16 Mb (0.2940)                             | 0.26 (0.0415)                                                          |
| 1439166_at   | Nol11         | 11:107.05 Mb                                    |                                                            | 6 (LAP)                                                                | 7:144.22 Mb (0.9250)                             | -0.32 (0.0011)                                                         |
| 1440579_at   | Mib1          | 18:10.77 Mb                                     |                                                            | 6 (LAP)                                                                | 17:69.15 Mb (0.5320)                             | -0.19 (0.0205)                                                         |
| 1444507_at   | Usp53         | 3:122.69 Mb                                     | 6                                                          | 6 (LAP)                                                                | 3:118.29 Mb (<0.0001)                            | -0.47 (<0.0001)                                                        |
| 1445410_at   | Naa35         | 13:59.73 Mb                                     |                                                            | 6 (LAP)                                                                | 2:13.36 Mb (0.7400)                              | -0.21 (0.0073)                                                         |
| 1446150_at   | Tmem47        | X:78.33 Mb                                      |                                                            | 6 (LAP)                                                                | X:99.32 Mb (0.5310)                              | -0.29 (0.0019)                                                         |
| 1446550_at   | Gspt1         | 16:11.25 Mb                                     |                                                            | 6 (LAP)                                                                | 5:123.74 Mb (0.3250)                             | -0.17 (0.0870)                                                         |
| 1452330_a_at | Mxra8         | 4:155.22 Mb                                     | 12                                                         | 6 (LAP)                                                                | 4:155.24 Mb (<0.0001)                            | -0.34 (0.0003)                                                         |
| 1454696_at   | Gnb1          | 4:154.93 Mb                                     | 6                                                          | 6 (LAP)                                                                | 4:155.24 Mb (<0.0001)                            | -1.98 (<0.0001)                                                        |
| 1456886_at   |               | 12:112.11 Mb                                    |                                                            | 6 (LAP)                                                                | 12:110.14 Mb (0.0950)                            | -0.31 (0.0007)                                                         |
| 1457480_at   | Pcgf3         | 5:108.9 Mb                                      |                                                            | 6 (LAP)                                                                | 12:104.27 Mb (0.1300)                            | -0.29 (0.0040)                                                         |
| 1458010_at   |               | 4:77.46 Mb                                      | 9                                                          | 6 (LAP)                                                                | 7:103.13 Mb (0.3590)                             | -0.66 (0.0005)                                                         |
| 1458947_at   | 2010111I01Rik | 13:63.35 Mb                                     |                                                            | 6 (LAP)                                                                | 13:63.06 Mb (0.0001)                             | -0.30 (0.0148)                                                         |
| 1459307_at   | Sec24b        | 3:129.73 Mb                                     | 6                                                          | 6 (LAP)                                                                | 2:16.23 Mb (0.5850)                              | -0.19 (0.0369)                                                         |
| 1460189_at   | Dcaf11        | 14:56.19 Mb                                     |                                                            | 6 (LAP)                                                                | 8:129.11 Mb (0.6300)                             | -0.09 (0.3087)                                                         |
| 1451457_at   | Sc5d          | 9:42.06 Mb                                      | 10                                                         | 9 (LAP)                                                                | 9:41.47 Mb (0.0001)                              | 0.71 (0.0090)                                                          |



**Table S5. Differential expression and differential variance eQTL for HAP3/LAP3 mice.**

| Type of QTL<br>Derived from HAP3/LAP3 | Generation DE/DV established | Chromosome | Locus with minimum p-value in region | Mb location of minimum p-value | Minimum Mb of significant SNPs in area (FDR<0.05) | Maximum Mb of significant SNPs in area (FDR<0.05) | Number of significant loci in area | minimum unadjusted p-value in area | minimum FDR in area | Overlap with deeQTL           | Overlap with HAP3 <sub>rv</sub> eQTL | Overlap with LAP3 <sub>rv</sub> eQTL | Overlap with bQTL                                                                                                                                        |
|---------------------------------------|------------------------------|------------|--------------------------------------|--------------------------------|---------------------------------------------------|---------------------------------------------------|------------------------------------|------------------------------------|---------------------|-------------------------------|--------------------------------------|--------------------------------------|----------------------------------------------------------------------------------------------------------------------------------------------------------|
| deeQTL                                | 6                            | 3          | rs13477323                           | 109.396                        | 99.396                                            | 151.705                                           | 9                                  | <0.0001                            | <0.0001             |                               | 3:118 - 138 (generation 9)           | 3:135.1 - 155.1 (generation 6)       | 3:0 - 224.84 (Belknap and Atkins 2001)<br>3:128.52 - 129.96 (Bice et al 2011)<br>3:137.82 - 138 (Bice et al 2011)<br>3:145.36 - 145.56 (Bice et al 2011) |
| deeQTL                                | 6                            | 4          | rs3701432                            | 29.190                         | 19.190                                            | 44.041                                            | 3                                  | <0.0001                            | <0.0001             |                               |                                      |                                      |                                                                                                                                                          |
| deeQTL                                | 6                            | 4          | rs13478067                           | 154.365                        | 144.365                                           | 165.385                                           | 4                                  | <0.0001                            | <0.0001             |                               | 4:139.68 - 159.68 (generation 8)     | 4:134.56 - 165.38 (generation 6)     | 4:52.01 - 202.78 (Belknap and Atkins 2001)                                                                                                               |
| deeQTL                                | 6                            | 7          | rs6241342                            | 126.326                        | 116.326                                           | 136.326                                           | 1                                  | 0.0005                             | 0.0306              |                               | 7:71.49 - 155.33 (generation 8)      |                                      | 7:114.4 - 136.3 (Rodriguez et al 1995)                                                                                                                   |
| deeQTL                                | 6                            | 18         | gnf18.021.931                        | 24.601                         | 14.601                                            | 34.601                                            | 1                                  | 0.0003                             | 0.0196              |                               |                                      |                                      |                                                                                                                                                          |
| deeQTL                                | 8                            | 1          | rs3669485                            | 13.975                         | 3.975                                             | 30.774                                            | 4                                  | 0.0001                             | 0.0327              |                               | 1:3.37 - 35.63 (generation 8)        |                                      | 1:1.8 - 13.57 (Bice et al 2011)                                                                                                                          |
| deeQTL                                | 9                            | 6          | rs13478906                           | 95.024                         | 82.570                                            | 108.028                                           | 3                                  | <0.0001                            | <0.0001             |                               | 6:67.07 - 87.07 (generation 8)       |                                      |                                                                                                                                                          |
| deeQTL                                | 10                           | 9          | CEL-9_29909656                       | 29.749                         | 19.749                                            | 50.268                                            | 4                                  | <0.0001                            | <0.0001             |                               |                                      |                                      | 9:0 - 113.49 (Belknap and Atkins 2001)                                                                                                                   |
| deeQTL                                | 13                           | 7          | rs13479416                           | 103.132                        | 85.155                                            | 131.843                                           | 6                                  | <0.0001                            | <0.0001             |                               | 7:71.49 - 155.33 (generation 8)      |                                      | 7:114.4 - 136.3 (Rodriguez et al 1995)                                                                                                                   |
| deeQTL                                | 13                           | 11         | rs3659787                            | 4.409                          | 0.000                                             | 26.853                                            | 2                                  | 0.0004                             | 0.0490              |                               | 11:0 - 57.93 (generation 8)          |                                      |                                                                                                                                                          |
| hap <sub>rv</sub> eQTL                | 6                            | 10         | rs3712998                            | 9.329                          | 0.000                                             | 19.329                                            | 1                                  | <0.0001                            | <0.0001             |                               |                                      | 10:0 - 29.8 (generation 6)           |                                                                                                                                                          |
| hap <sub>rv</sub> eQTL                | 8                            | 1          | rs6404446                            | 20.774                         | 3.373                                             | 35.632                                            | 8                                  | <0.0001                            | <0.0001             | 1:3.98 - 30.77 (generation 8) |                                      | 1:33.8 - 53.8 (generation 6)         | 1:1.8 - 13.57 (Bice et al 2011)                                                                                                                          |
| hap <sub>rv</sub> eQTL                | 8                            | 1          | rs13475984                           | 94.608                         | 84.608                                            | 104.608                                           | 1                                  | 0.0006                             | 0.0159              |                               |                                      |                                      | 1:95.13 - 108.62 (Bice et al 2011)                                                                                                                       |
| hap <sub>rv</sub> eQTL                | 8                            | 2          | gnf02.006.767                        | 9.751                          | 0.000                                             | 27.962                                            | 5                                  | <0.0001                            | <0.0001             |                               |                                      |                                      | 2:3.45 - 146.16 (Belknap and Atkins 2001)                                                                                                                |

**Table S5. Differential expression and differential variance eQTL for HAP3/LAP3 mice.**

| Type of QTL Derived from HAP3/LAP3 | Generation DE/DV established | Chromosome | Locus with minimum p-value in region | Mb location of minimum p-value | Minimum Mb of significant SNPs in area (FDR<0.05) | Maximum Mb of significant SNPs in area (FDR<0.05) | Number of significant loci in area | minimum unadjusted p-value in area | minimum FDR in area | Overlap with deQTL                                                   | Overlap with HAP3 <sub>ve</sub> QTL | Overlap with LAP3 <sub>ve</sub> QTL | Overlap with bQTL                                                                                                 |
|------------------------------------|------------------------------|------------|--------------------------------------|--------------------------------|---------------------------------------------------|---------------------------------------------------|------------------------------------|------------------------------------|---------------------|----------------------------------------------------------------------|-------------------------------------|-------------------------------------|-------------------------------------------------------------------------------------------------------------------|
| hap. <sub>ve</sub> QTL             | 8                            | 4          | rs13478048                           | 149.684                        | 139.684                                           | 159.684                                           | 1                                  | 0.0023                             | 0.0417              | 4:144.37 - 165.38 (generation 6)                                     |                                     | 4:134.56 - 165.38 (generation 6)    | 4:52.01 - 202.78 (Belknap and Atkins 2001)                                                                        |
| hap. <sub>ve</sub> QTL             | 8                            | 6          | rs6199416                            | 77.070                         | 67.070                                            | 87.070                                            | 1                                  | 0.0005                             | 0.0148              | 6:82.57 - 108.03 (generation 9)                                      |                                     |                                     |                                                                                                                   |
| hap. <sub>ve</sub> QTL             | 8                            | 7          | rs13479374                           | 91.031                         | 71.492                                            | 155.329                                           | 17                                 | <0.0001                            | <0.0001             | 7:116.33 - 136.33 (generation 6)<br>7:85.16 - 131.84 (generation 13) |                                     |                                     | 7:114.4 - 136.3 (Rodriguez et al 1995)                                                                            |
| hap. <sub>ve</sub> QTL             | 8                            | 9          | rs3654196                            | 79.991                         | 67.217                                            | 89.991                                            | 2                                  | 0.0003                             | 0.0109              |                                                                      |                                     |                                     | 9:0 - 113.49 (Belknap and Atkins 2001)<br>9:68.52 - 70.67 (Bice et al 2011)                                       |
| hap. <sub>ve</sub> QTL             | 8                            | 11         | rs3659787                            | 4.409                          | 0.000                                             | 57.931                                            | 13                                 | <0.0001                            | <0.0001             | 11:0 - 26.85 (generation 13)                                         |                                     |                                     |                                                                                                                   |
| hap. <sub>ve</sub> QTL             | 8                            | 14         | rs13482388                           | 116.961                        | 104.013                                           | 126.961                                           | 2                                  | 0.0011                             | 0.0251              |                                                                      |                                     |                                     |                                                                                                                   |
| hap. <sub>ve</sub> QTL             | 8                            | 17         | rs3657117                            | 69.399                         | 59.149                                            | 79.399                                            | 2                                  | 0.0003                             | 0.0109              |                                                                      |                                     |                                     |                                                                                                                   |
| hap. <sub>ve</sub> QTL             | 8                            | 19         | rs13483549                           | 18.231                         | 5.844                                             | 48.910                                            | 4                                  | 0.0013                             | 0.0283              |                                                                      |                                     |                                     |                                                                                                                   |
| hap. <sub>ve</sub> QTL             | 9                            | 2          | rs6411422                            | 128.199                        | 118.199                                           | 138.199                                           | 1                                  | 0.0012                             | 0.0392              |                                                                      |                                     |                                     | 2:3.45 - 146.16 (Belknap and Atkins 2001)                                                                         |
| hap. <sub>ve</sub> QTL             | 9                            | 2          | rs3143843                            | 169.778                        | 159.778                                           | 179.778                                           | 1                                  | 0.0001                             | 0.0065              |                                                                      |                                     |                                     |                                                                                                                   |
| hap. <sub>ve</sub> QTL             | 9                            | 3          | rs13477011                           | 21.266                         | 11.266                                            | 31.266                                            | 1                                  | 0.0009                             | 0.0315              |                                                                      |                                     |                                     | 3:0 - 224.84 (Belknap and Atkins 2001)                                                                            |
| hap. <sub>ve</sub> QTL             | 9                            | 3          | rs3674810                            | 67.947                         | 51.270                                            | 99.347                                            | 7                                  | <0.0001                            | <0.0001             |                                                                      |                                     |                                     | 3:0 - 224.84 (Belknap and Atkins 2001)                                                                            |
| hap. <sub>ve</sub> QTL             | 9                            | 3          | rs3670168                            | 127.995                        | 117.995                                           | 137.995                                           | 1                                  | 0.0016                             | 0.0490              | 3:99.4 - 151.7 (generation 6)                                        |                                     | 3:135.1 - 155.1 (generation 6)      | 3:0 - 224.84 (Belknap and Atkins 2001)<br>3:128.52 - 129.96 (Bice et al 2011)<br>3:137.82 - 138 (Bice et al 2011) |
| hap. <sub>ve</sub> QTL             | 9                            | 4          | CEL-4_8632642                        | 87.698                         | 77.698                                            | 118.880                                           | 5                                  | <0.0001                            | <0.0001             |                                                                      |                                     |                                     | 4:52.01 - 202.78 (Belknap and Atkins 2001)                                                                        |

**Table S5. Differential expression and differential variance eQTL for HAP3/LAP3 mice.**

| Type of QTL Derived from HAP3/LAP3 | Generation DE/DV established | Chromosome | Locus with minimum p-value in region | Mb location of minimum p-value | Minimum Mb of significant SNPs in area (FDR<0.05) | Maximum Mb of significant SNPs in area (FDR<0.05) | Number of significant loci in area | minimum unadjusted p-value in area | minimum FDR in area | Overlap with deQTL               | Overlap with HAP3 <i>rv</i> eQTL | Overlap with LAP3 <i>rv</i> eQTL | Overlap with bQTL                                                                                                 |
|------------------------------------|------------------------------|------------|--------------------------------------|--------------------------------|---------------------------------------------------|---------------------------------------------------|------------------------------------|------------------------------------|---------------------|----------------------------------|----------------------------------|----------------------------------|-------------------------------------------------------------------------------------------------------------------|
|                                    |                              |            | 8                                    |                                |                                                   |                                                   |                                    |                                    |                     |                                  |                                  |                                  | 2001)                                                                                                             |
| hap. <i>rv</i> eQTL                | 9                            | 5          | rs3716195                            | 42.448                         | 32.448                                            | 68.079                                            | 3                                  | 0.0003                             | 0.0140              |                                  |                                  |                                  |                                                                                                                   |
| hap. <i>rv</i> eQTL                | 9                            | 6          | rs6215575                            | 38.079                         | 28.079                                            | 48.079                                            | 1                                  | 0.0009                             | 0.0315              |                                  |                                  |                                  |                                                                                                                   |
| hap. <i>rv</i> eQTL                | 9                            | 8          | rs13479914                           | 93.350                         | 83.172                                            | 115.278                                           | 4                                  | <0.0001                            | <0.0001             |                                  |                                  |                                  |                                                                                                                   |
| hap. <i>rv</i> eQTL                | 9                            | 14         | rs6265743                            | 120.111                        | 110.111                                           | 134.508                                           | 3                                  | <0.0001                            | <0.0001             |                                  |                                  |                                  |                                                                                                                   |
| hap. <i>rv</i> eQTL                | 9                            | 16         | rs4221305                            | 96.944                         | 86.944                                            | 106.944                                           | 1                                  | 0.0005                             | 0.0196              |                                  |                                  |                                  |                                                                                                                   |
| hap. <i>rv</i> eQTL                | 9                            | 17         | rs13482947                           | 31.770                         | 21.770                                            | 41.770                                            | 1                                  | 0.0003                             | 0.0140              |                                  |                                  |                                  |                                                                                                                   |
| hap. <i>rv</i> eQTL                | 9                            | 19         | rs13483589                           | 30.056                         | 20.056                                            | 42.962                                            | 3                                  | <0.0001                            | <0.0001             |                                  |                                  |                                  |                                                                                                                   |
| lap. <i>rv</i> eQTL                | 6                            | 1          | rs13459182                           | 43.799                         | 33.799                                            | 53.799                                            | 1                                  | 0.0009                             | 0.0441              |                                  | 1:3.37 - 35.63 (generation 8)    |                                  |                                                                                                                   |
| lap. <i>rv</i> eQTL                | 6                            | 3          | rs3688244                            | 145.095                        | 135.095                                           | 155.095                                           | 1                                  | <0.0001                            | <0.0001             | 3:99.4 - 151.7 (generation 6)    | 3:118 - 138 (generation 9)       |                                  | 3:0 - 224.84 (Belknap and Atkins 2001)<br>3:137.82 - 138 (Bice et al 2011)<br>3:145.36 - 145.56 (Bice et al 2011) |
| lap. <i>rv</i> eQTL                | 6                            | 4          | rs4224919                            | 144.563                        | 134.563                                           | 165.385                                           | 10                                 | <0.0001                            | <0.0001             | 4:144.37 - 165.38 (generation 6) | 4:139.68 - 159.68 (generation 8) |                                  | 4:52.01 - 202.78 (Belknap and Atkins 2001)                                                                        |
| lap. <i>rv</i> eQTL                | 6                            | 10         | CEL-10_14430696                      | 14.293                         | 0.000                                             | 29.804                                            | 5                                  | <0.0001                            | <0.0001             |                                  | 10:0 - 19.33 (generation 6)      |                                  |                                                                                                                   |
| lap. <i>rv</i> eQTL                | 6                            | 10         | rs13480625                           | 64.173                         | 54.173                                            | 74.173                                            | 1                                  | 0.0002                             | 0.0109              |                                  |                                  |                                  |                                                                                                                   |
| lap. <i>rv</i> eQTL                | 6                            | X          | rs13484030                           | 135.887                        | 123.125                                           | 145.887                                           | 2                                  | 0.0001                             | 0.0070              |                                  |                                  |                                  |                                                                                                                   |
